# Supplementary material for: Self-assembly of 3D porous architectures from energetic nanoparticles for enhanced energetic performances
Source: Royal Society of Chemistry journal article supplement (doi:10.1039/c8ce01243a), 2018-01-01
Supplement: c8ce01243a1.pdf [file c8ce01243a1.pdf]

**Supplementary information for**

**Self-assembly of 3D porous architectures from  
energetic nanoparticles for enhanced energetic  
performances**

Jun Wang<sup>a,b\*</sup>, Long Zhang<sup>a</sup>, Xiangli Guo<sup>a</sup>, Yanyang Qu<sup>a</sup>, Wanting Pang<sup>a</sup>, Xiaowei  
Chen<sup>b\*</sup>

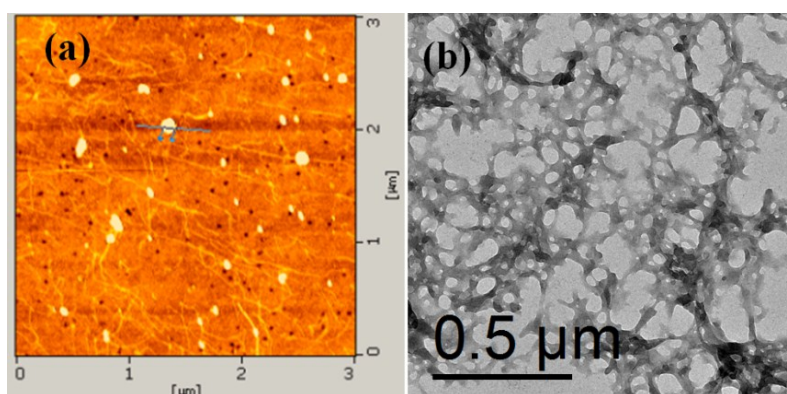

**Supplementary Figure 1.** (a) Atomic force microscope image of TATB nanoparticles. (b) Transmission electron microscope image of the TATB with 3D hierarchical porous architecture.

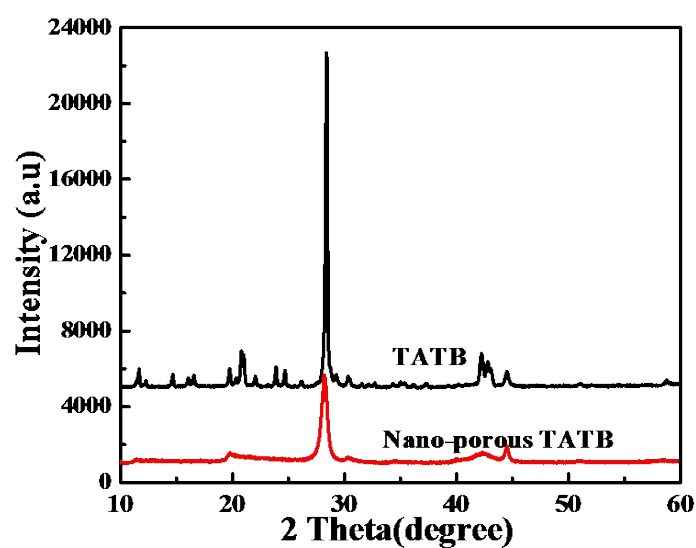

**Supplementary Figure 2.** X-ray diffraction patterns of raw TATB and TATB with 3D hierarchical porous architecture.

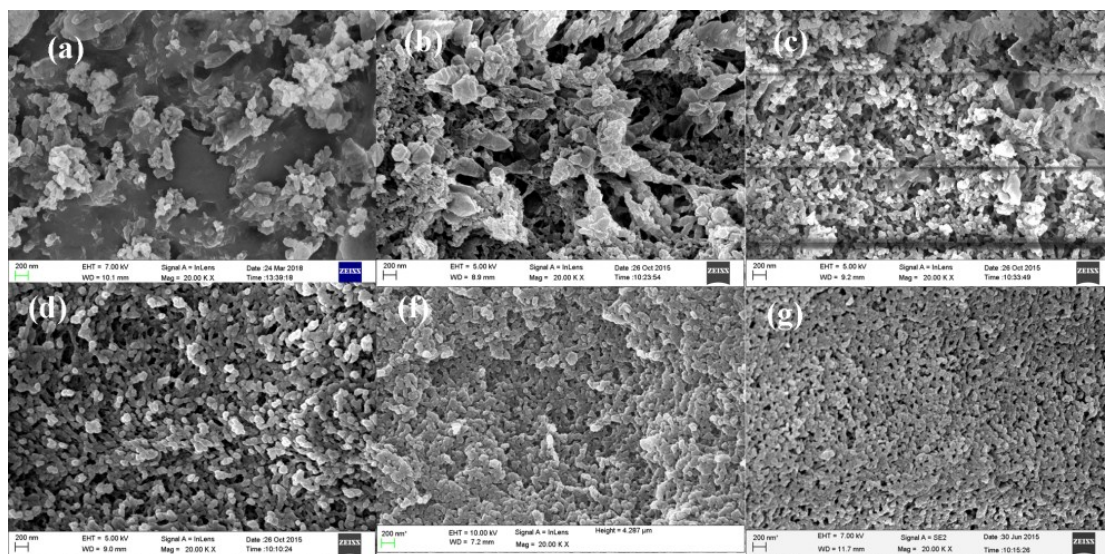

**Supplementary Figure 3.** FE-SEM images of 3D TATB porous architecture with different particle size and specific surface area.

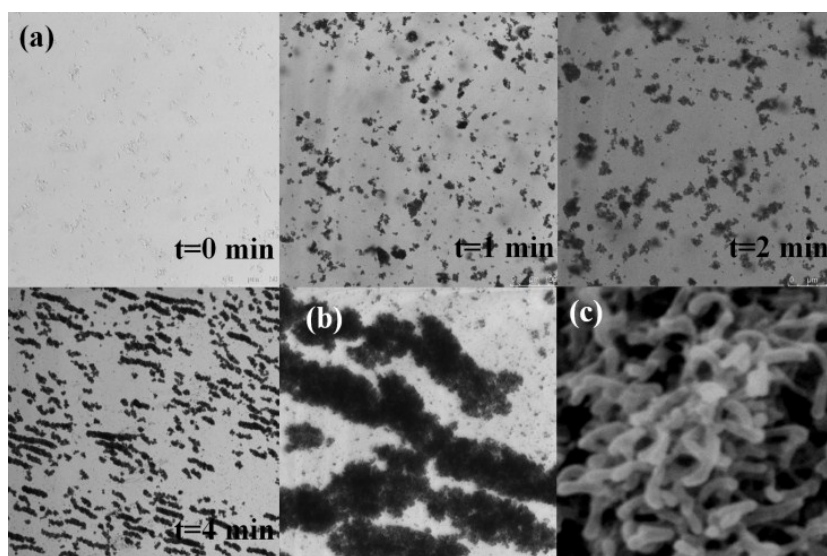

**Supplementary Figure 4.** (a)-(b) Self-assembly of TATB nano-particles into 3D TATB composed of TATB nanorods. (c) FE-SEM image of 3D TATB architectures with hierarchical pore network consisted of TATB nano-rods.

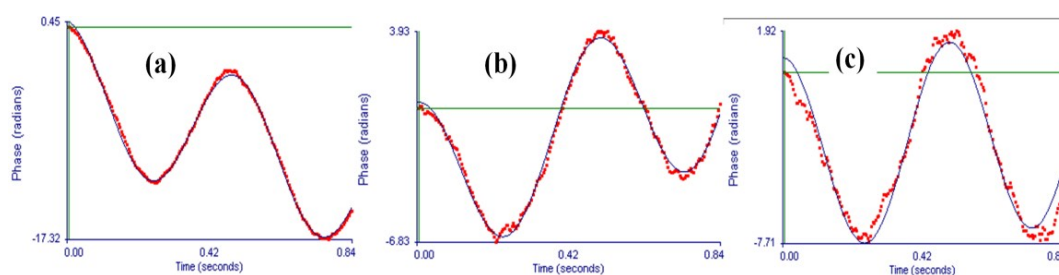

**Supplementary Figure 5.** Zeta potential curves in solution containing TATB nanoparticles and water. The value for the zeta potential was (a) -32 eV, (b) -24 eV, and (c) -19eV.

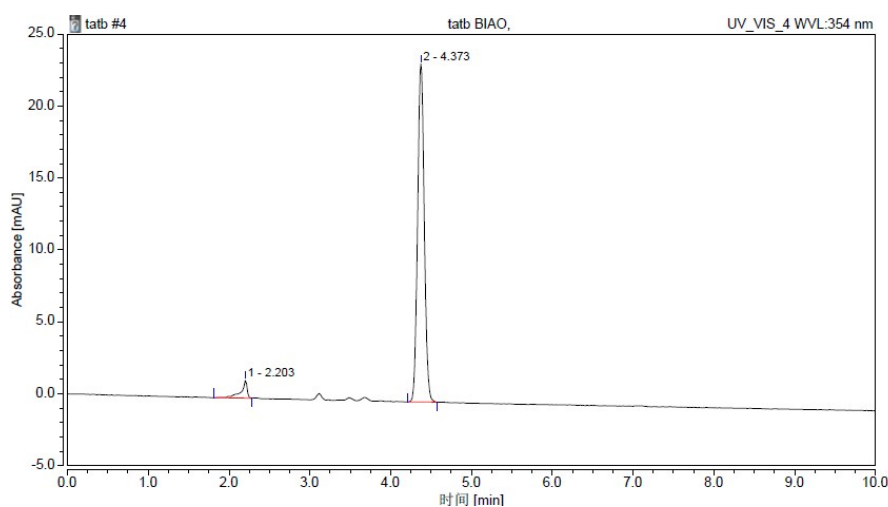

**Supplementary Figure 6.** trace amounts of TATB molecules dissolved in water and solvent.

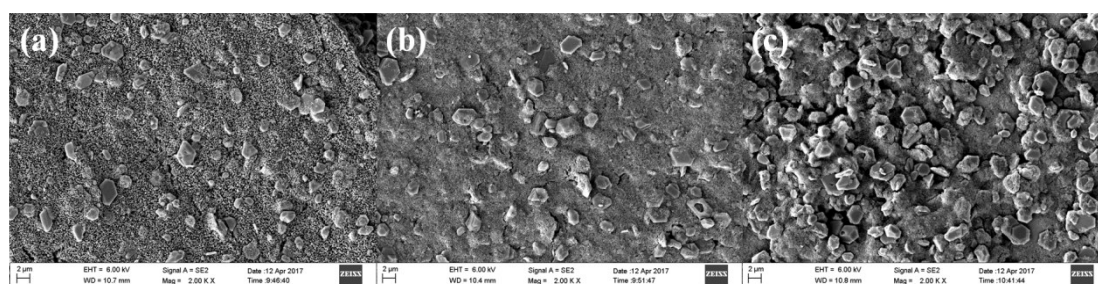

**Supplementary Figure 7.** Growth of nano-TATB to form micro-TATB by micro-crystallization in water at 0 °C.

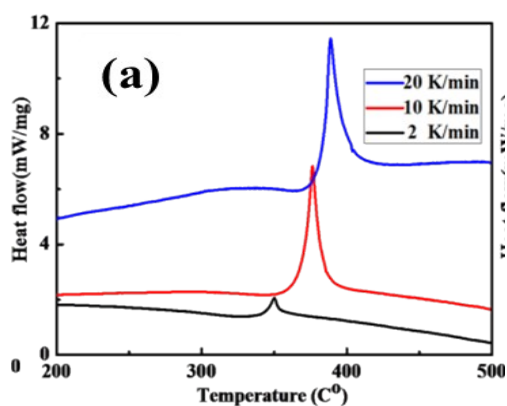

**Supplementary Figure 8.** Differential Scanning calorimeter curves of raw TATB

**Supplementary Table 1.** Specific surface area of porous nanostructure on different temperature

| Temperature/ °C                          | 0   | -10  | -20  | -30  | -40  | -196 (liquid N <sub>2</sub> ) |
|------------------------------------------|-----|------|------|------|------|-------------------------------|
| Specific surface area/ m <sup>2</sup> /g | 7.3 | 13.6 | 23.6 | 26.7 | 28.3 | 36.5                          |

Table 1 suggests that the specific surface area of TATB sample is increased with the decreasing of the freezing temperature.

**Supplementary Table 2.** Particle size, specific surface area and pore size of different energetic materials prepared by our method.

| Sample                           | DAAF  | DAAzF  | LLM-105 | LLM-105/TATB |
|----------------------------------|-------|--------|---------|--------------|
| Particle size (nm)               | 40-60 | 80-100 | 60-70   | 70-80        |
| Surface area (m <sup>2</sup> /g) | 16.9  | 11.2   | 18.6    | 18.6         |
